# Supplementary material for: Targeted Mutagenesis of the Multicopy Myrosinase Gene Family in Allotetraploid Brassica juncea Reduces Pungency in Fresh Leaves across Environments
Source: Plants (Basel). 2022 Sep 23;11(19):2494. doi: 10.3390/plants11192494 (PMC9572489; doi:10.3390/plants11192494)
Supplement: Supplementary file 1 [file plants-11-02494-s001.zip › plants-1888607-supplementary.pdf]

**Table S1.** Plasmid purity test results

| Sample                                        | Red Giant edited line | MPS798_S43 (unedited negative control 1) | MPS799_S44 (unedited negative control 2) | CE73908_S50 (Transgene positive) | MPS801_S30 (1:5 dilution of Transgene positive) |
|-----------------------------------------------|-----------------------|------------------------------------------|------------------------------------------|----------------------------------|-------------------------------------------------|
| raw reads                                     | 264024                | 543992                                   | 588749                                   | 509747                           | 377808                                          |
| quality reads                                 | 263871                | 542053                                   | 587151                                   | 508896                           | 375882                                          |
| mapped reads                                  | 262698                | 518478                                   | 524618                                   | 504231                           | 354495                                          |
| quality read percent                          | 99.9                  | 99.6                                     | 99.7                                     | 99.8                             | 99.5                                            |
| mapped read percent                           | 99.4                  | 95.6                                     | 89.3                                     | 99                               | 94.2                                            |
| mapped reads <i>B. juncea</i> control gene1   | 11913                 | 16999                                    | 22439                                    | 17673                            | 8917                                            |
| mapped reads <i>B. juncea</i> control gene2   | 11051                 | 18789                                    | 21761                                    | 18174                            | 14273                                           |
| mapped reads <i>B. juncea</i> control gene1 % | 4.53                  | 3.28                                     | 4.28                                     | 3.5                              | 2.52                                            |
| mapped reads <i>B. juncea</i> control gene2 % | 4.21                  | 3.62                                     | 4.15                                     | 3.6                              | 4.03                                            |
| mapped reads pWISE total                      | 68                    | 211                                      | 262                                      | 156533                           | 117921                                          |
| mapped reads plasmid total percent            | 0.03                  | 0.04                                     | 0.05                                     | 31.04                            | 33.26                                           |
| Result                                        | negative              | negative                                 | negative                                 | positive                         | positive                                        |

**Table S2.** Sensory data summary demonstrating non-pungent perception of edited Red Giant material with multiple tasters

|             | Average | Std. Dev. | n samples | n tasters |
|-------------|---------|-----------|-----------|-----------|
| edited RG   | 1.0     | 0.0       | 30        | 7         |
| unedited RG | 3.7     | 0.95      | 7         | 4         |

**Note:** non-pungent (score of 1), slightly pungent (score of 2), moderately pungent (score of 3), pungent (score of 4) and very pungent (score of 5)

**Table S3.** ANOVA table for reduced model with factors for the cultivar, harvest stage, environment and interaction effect harvest stage and environment. The interaction and cultivar terms were highly significant factors for the GRA levels at an alpha level of 0.5

| <b>Effect</b>              | <b>DF</b> | <b>Sum of Squares</b> | <b>Mean Square</b> | <b>F-Value</b> | <b>p-value</b> |
|----------------------------|-----------|-----------------------|--------------------|----------------|----------------|
| Cultivar                   | 1         | 50.318                | 50.318             | 278.78         | <0.0001        |
| Harvest Stage              | 1         | 0.003                 | 0.003              | 0.02           | 0.9            |
| Environment                | 2         | 0.466                 | 0.233              | 1.28           | 0.2873         |
| Harvest Stage: Environment | 2         | 6.524                 | 3.262              | 17.88          | <0.0001        |
| Residuals                  | 52        | 9.488                 | 0.183              |                |                |

**Table S4. Post-hoc** pairwise comparisons for glucose release assay absorption as a proxy for myrosinase activity between unedited and edited Red Giant at different harvest stages and between environments derived from the analysis of variance model (ANOVA) with factors for the cultivar, harvest stage, environment and associated interactions. At a significance level of 0.5, the unedited Red Giant line had significantly larger GRA estimates than the edited Red Giant line across environments and harvest stages. Estimated differences between the edited Red Giant and unedited Red Giant lines are the same across harvests stages and environments because the environment by harvest stage interaction term is not a factor for within environment and harvest stage comparisons.

| Line #1            | Line #2          | Environment                | Harvest Stage | Estimated Mean GRA Difference | Standard Error | DF | T-Statistic | p-value |
|--------------------|------------------|----------------------------|---------------|-------------------------------|----------------|----|-------------|---------|
| Unedited Red Giant | Edited Red Giant | Growth Chamber, Durham, NC | Baby          | 1.84                          | 0.11           | 52 | 16.34       | <0.0001 |
| Unedited Red Giant | Edited Red Giant | Salinas, CA                | Baby          | 1.84                          | 0.11           | 52 | 16.34       | <0.0001 |
| Unedited Red Giant | Edited Red Giant | Yuma, AZ                   | Baby          | 1.84                          | 0.11           | 52 | 16.34       | <0.0001 |
| Unedited Red Giant | Edited Red Giant | Growth Chamber, Durham, NC | Mature        | 1.84                          | 0.11           | 52 | 16.34       | <0.0001 |
| Unedited Red Giant | Edited Red Giant | Salinas, CA                | Mature        | 1.84                          | 0.11           | 52 | 16.34       | <0.0001 |
| Unedited Red Giant | Edited Red Giant | Yuma, AZ                   | Mature        | 1.84                          | 0.11           | 52 | 16.34       | <0.0001 |

**Table S5.** Monthly maximum, average, and minimum temperature and humidity, and monthly precipitation for Moses Lake, WA during the 2021 growing season.

| Month  | Temperature<br>(°C) |      |      | Humidity<br>(%) |      |      | Precipitation<br>(mm) |
|--------|---------------------|------|------|-----------------|------|------|-----------------------|
|        | Max                 | Avg  | Min  | Max             | Avg  | Min  | Total                 |
| May    | 32.2                | 17.5 | 3.3  | 63.6            | 36.6 | 18.1 | 2                     |
| June   | 45.6                | 24.5 | 7.8  | 59.6            | 35.0 | 16.6 | 5                     |
| July   | 41.7                | 26.7 | 11.1 | 63.4            | 34.9 | 15.4 | 0                     |
| August | 38.3                | 23.0 | 7.8  | 69.7            | 42.6 | 22.5 | 4                     |

**Table S6.** Monthly maximum, average, and minimum temperature and humidity, and monthly precipitation for Yuma, AZ during the 2021/2022 growing season.

| Month    | Temperature<br>(°C) |      |      | Humidity<br>(%) |      |      | Precipitation<br>(mm) |
|----------|---------------------|------|------|-----------------|------|------|-----------------------|
|          | Max                 | Avg  | Min  | Max             | Avg  | Min  | Total                 |
| November | 32.8                | 21.2 | 10.0 | 63.6            | 36.6 | 18.1 | 0                     |
| December | 29.4                | 14.9 | 5.0  | 59.6            | 35.0 | 16.6 | 6                     |
| January  | 24.4                | 14.7 | 3.3  | 63.4            | 34.9 | 15.4 | 1                     |
| February | 30.0                | 15.9 | 2.2  | 69.7            | 42.6 | 22.5 | 1                     |

**Table S7.** List of primers used for pWISE687 and edit characterization.

| Primer name | sequence                 | Direction | Purpose              |
|-------------|--------------------------|-----------|----------------------|
| NGS1PM1723  | GACCGCCAGATCATGTATGT     | Forward   | NGS assay primer     |
| NGS1PM1724  | GACCGCCAGATCATGTAGGT     | Forward   | NGS assay primer     |
| NGS1PM1725  | GACCCTCAGATCATGTATGA     | Forward   | NGS assay primer     |
| NGS1PM1726  | GACCCCCAGATCATGTATGT     | Forward   | NGS assay primer     |
| NGS1PM1727  | GATCTTCCCTCCTTGGAAGT     | Reverse   | NGS assay primer     |
| NGS1PM1728  | AATCTTCCCTTGTGTCCTG      | Reverse   | NGS assay primer     |
| NGS1PM1729  | AATCTTCCCTTTTGGAACTGT    | Reverse   | NGS assay primer     |
| NGS1PM1730  | AATCTTCCCGTTTTGGAACTG    | Reverse   | NGS assay primer     |
| NGS1PM1731  | AATCTTCCCTTTTGGAACTGTT   | Reverse   | NGS assay primer     |
| NGS1PM1732  | AATCTTCCCTTTTGGAACTGC    | Reverse   | NGS assay primer     |
| NGS1PM1733  | AATCTTACCTCCTTGATGCTGT   | Reverse   | NGS assay primer     |
| TQ144       | AGTACTGTTCTGTTGGGCGAGAGA | Forward   | qPCR assay           |
| TQ149       | TCCCGACGGACGTAAAG        | Reverse   | qPCR assay           |
| TQ151       | TTACGCATCCATGACTG        | MGB probe | qPCR assay           |
| TQ00135     | CATCGAAACTATCCTCCCAGAGTT | Forward   | qPCR assay           |
| TQ00136     | GCGGTTGTGAACCCGTTAAA     | Reverse   | qPCR assay           |
| TQ0117      | TCGCGCTGGTGAAC           | MGB probe | qPCR assay           |
| TQ0065      | TATGGACATTTTCGAGAAGGTGG  | Forward   | qPCR assay           |
| TQ0066      | CGACGTCATAATCGGAATTGAGA  | Reverse   | qPCR assay           |
| TQ0043      | CGATCTTCGATAAGCAC        | MGB probe | qPCR assay           |
| TQ0124      | TGCCTGACATCCGCCTACA      | Forward   | qPCR assay           |
| TQ0125      | AGGGCCATGAAGCTGGAGTAA    | Reverse   | qPCR assay           |
| TQ0126      | CTGTGAGCAGTCCGAC         | MGB probe | qPCR assay           |
| NGS1PM3801  | ACCACCAACTCATAGATGCAC    | Forward   | 1.3 left + 1.4 right |
| NGS1PM3802  | ACCATTTAATGTAAACAAACAA   | Reverse   | 1.3 left + 1.4 right |
| NGS1PM2729  | TATAGTACTTACCTGGGAGCT    | Forward   | 1.4 left + 1.5 right |
| NGS1PM3731  | TCTAGTTATACAGACCACCTTTAG | Reverse   | 1.4 left + 1.5 right |

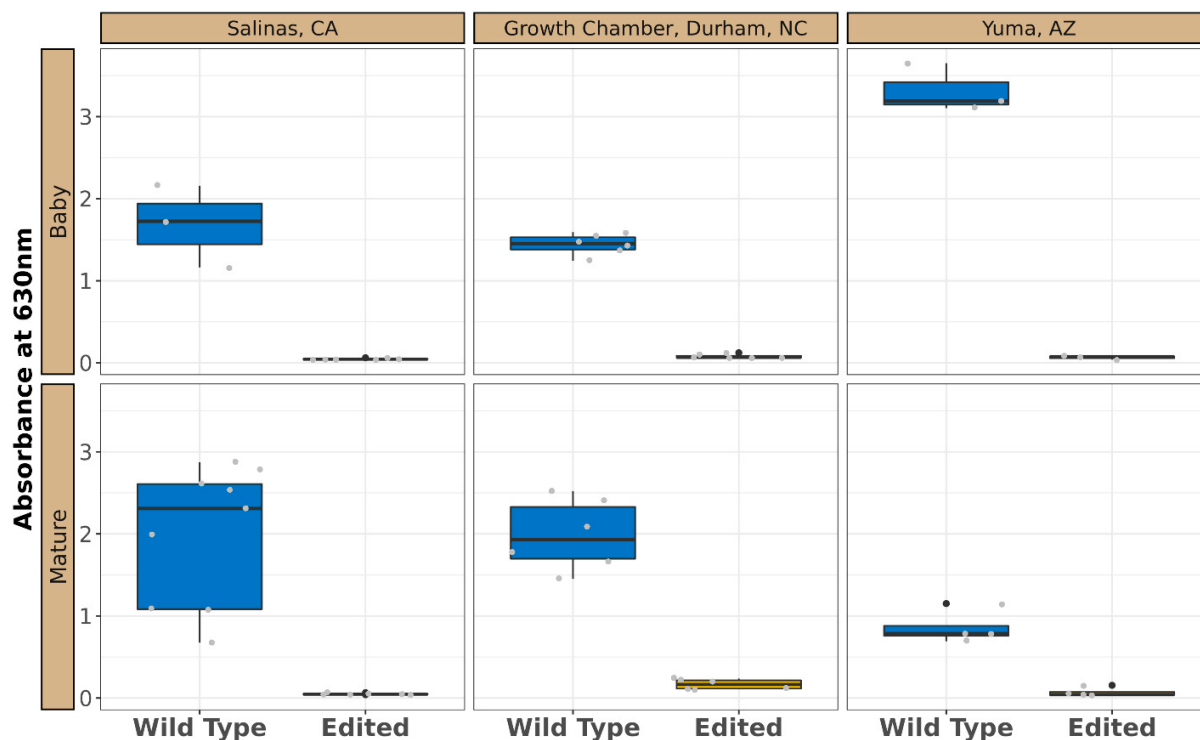

**Figure S1.** Distribution of glucose release absorbance values at 630 nm from leaf discs in the presence sinigrin for unedited and edited Red Giant mustard cultivars by environment and harvest stage. Leaf samples were randomly selected from harvested material. Baby leaves were harvested 31 days post wet date in Salinas, CA on 9/20/2021; 19 days post wet date in the growth chamber on 1/4/2022; and 46 days post wet date in Yuma, AZ on 1/4/2022. Mature leaves were harvested 61 days post wet date in Salinas, CA on 12/2/2021; 48 days post wet date in the growth chamber on 12/16/2021; and 75 days post wet date in Yuma, AZ on 2/2/2022. Data values are the GRA colorimetric absorbance values at 630 nm from leaf discs processed in the presence of sinigrin.

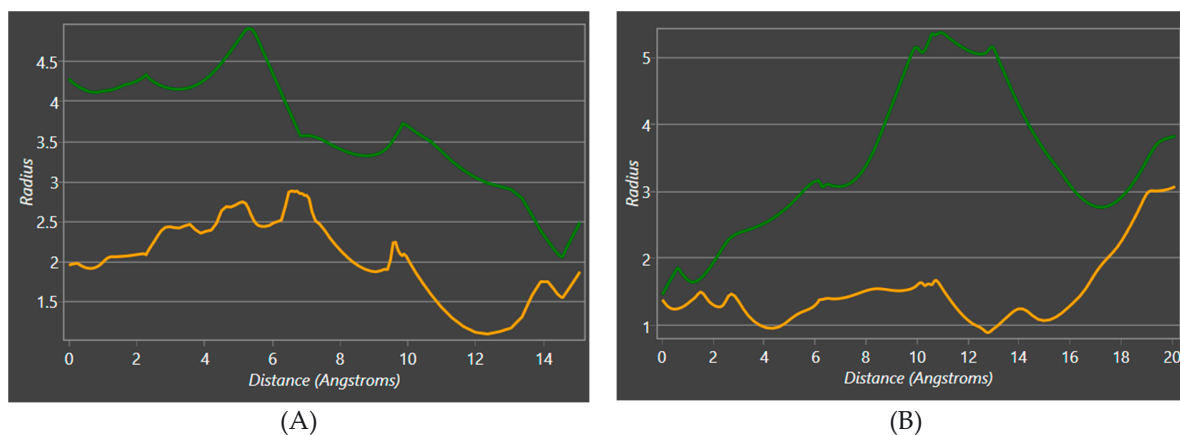

Figure S2: Radius (orange) and free radius (green) measurements of pockets identified in wild-type (A) and edited (B) B05 myrosinase using MOLE2.5. Radius measurements indicate the radius of the largest possible sphere that could fit at a given point along the pocket, while free radius measurements indicate the distance from the center of the pocket to the protein backbone and do not account for side chain identities or conformations.

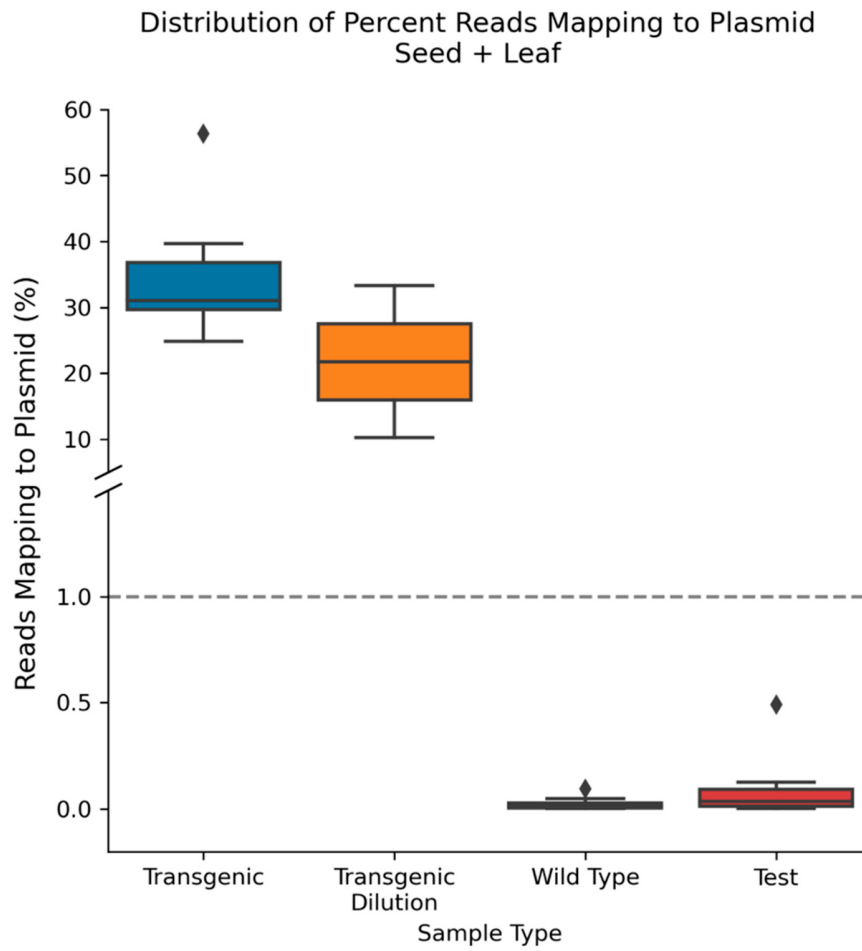

**Figure S3.** Standard boxplots showing distribution of % reads mapping to the plasmid in transgenic and control samples. The gray line indicates the 1% threshold.

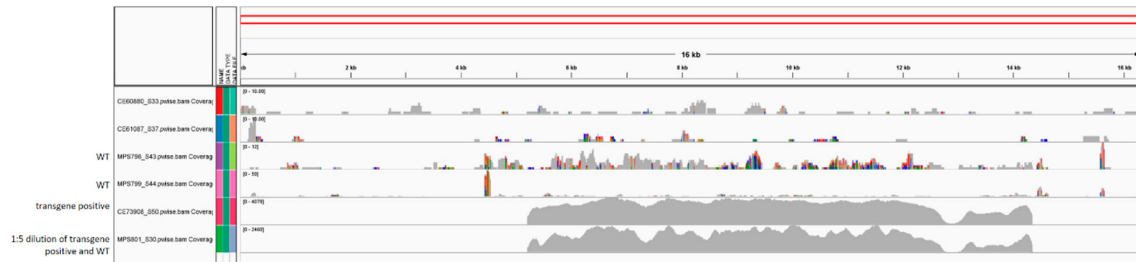

**Figure S4.** IGV screenshot showing read alignment histograms to the plasmid sequence for edited lines ( $\text{coverage}_{\text{max}} = 10\text{x}$ ,  $10\text{x}$ ), two wild-type samples ( $\text{coverage}_{\text{max}} = 12\text{x}$ ,  $50\text{x}$ ), transgene positive sample ( $\text{coverage}_{\text{max}} = 4,078\text{x}$ ), and 1:5 dilution of transgene positive sample in WT ( $\text{coverage}_{\text{max}} = 2,460\text{x}$ ). Note that y-axis scales for read coverage are variable and labeled on the left side of each track.

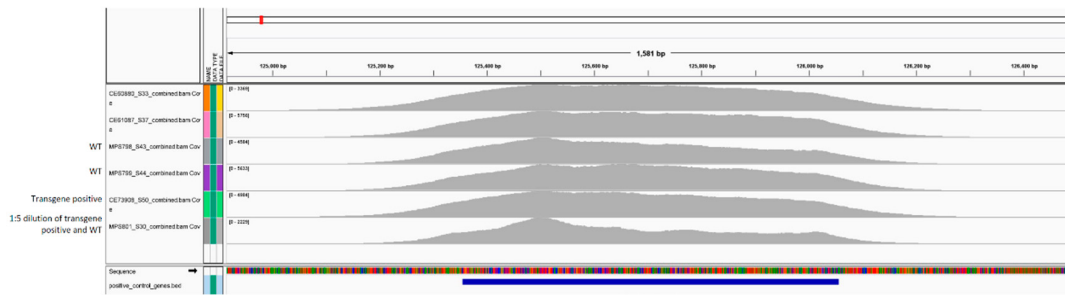

**Figure S5.** IGV screenshot showing read alignment histograms to positive control gene 1 sequence for edited lines ( $\text{coverage}_{\text{max}} = 3,369\text{x}$ ,  $5,756\text{x}$ ), two unedited samples ( $\text{coverage}_{\text{max}} = 4,584\text{x}$ ,  $5,633\text{x}$ ), transgene positive sample ( $\text{coverage}_{\text{max}} = 4,984\text{x}$ ), and 1:5 dilution of transgene positive sample in unedited *B. juncea* ( $\text{coverage}_{\text{max}} = 2,229\text{x}$ ).

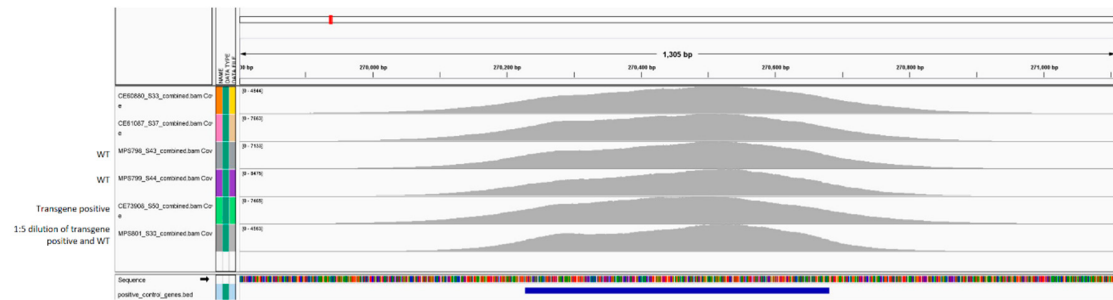

**Figure S6.** IGV screenshot showing read alignment histograms to positive control gene 2 sequence for edited lines (coverage<sub>max</sub> = 4,844x, 7,633x), two unedited samples (coverage<sub>max</sub> = 7,133x, 8,475x), transgene positive sample (coverage<sub>max</sub> = 7,465x), and 1:5 dilution of transgene positive sample in unedited *B. juncea* (coverage<sub>max</sub> = 4,563x).
